# Supplementary material
Source: publisher figshare collection journal article supplement (https://acs.figshare.com/ndownloader/files/4534561)
Supplement: Supplementary file 1 [file 4534561]

**Supplementary Information For;**

**Tris(imidazolin-2-ylidene-1-yl)borate Complexes of the  
Heavier Alkaline Earths: Synthesis and Structural Studies**

Merle Arrowsmith, Alex Heath, Michael S. Hill\* and Gabriele Kociok-Köhn

<sup>a</sup> *Department of Chemistry, University of Bath, Claverton Down, Bath, BA2 7AY, U.K.*

<sup>b</sup> *Department of Chemistry, Imperial College London, Exhibition Rd., South Kensington, London, SW7 2AZ, U.K.*

<sup>c</sup> *The Chemistry Laboratory, University of Sussex, Falmer, Brighton, East Sussex, BN1 9QJ, U.K.*

Aminoalkene synthesis and NMR scale hydroamination reactions.

NMR Spectra of products of reactions to form compounds **4** and **8**

Figure S1: <sup>1</sup>H NMR spectrum of **4** in d<sub>8</sub>-toluene

Figure S2: Enhanced view of the BH signal region for compound **4** in d<sub>8</sub>-toluene

Figure S3: <sup>1</sup>H NMR spectrum of a mixture of **2** and **8** in d<sub>8</sub>-toluene

## **Aminoalkene synthesis**

**Representative procedure:**<sup>1</sup> To a suspension of LiNMe<sub>2</sub> or LDA (1.1 equiv.) in THF at -78 °C was added to the nitrile (1 equiv.). The reaction was stirred for 30 min and warmed to room temperature, dimethylamine evolution was observed. The electrophile (1.2 equiv.) was added via syringe and the reaction mixture stirred overnight. The reaction was cooled in an ice-water bath and quenched with H<sub>2</sub>O, extraction with ether (3 x 100 mL), drying over MgSO<sub>4</sub> and removal of the solvent gave the crude nitrile as a colourless or light yellow oil. The latter was characterised solely by <sup>1</sup>H NMR spectroscopy and useful without further purification. To a suspension of LiAlH<sub>4</sub> (2.5 equiv.) in diethyl ether under an inert atmosphere was added the nitrile (1 equiv.) as a solution in the same solvent. The mixture was stirred for 30 min at room temperature, then refluxed for 3 h and finally cooled and left to stir overnight at room temperature. The reaction was quenched by slow addition to a 95:5 mixture of THF:H<sub>2</sub>O cooled to -20 °C (ice-acetone bath). The solid was filtered, and washed with several portions of diethyl ether (3 x 50 mL). The combined filtrates were washed with H<sub>2</sub>O, dried over MgSO<sub>4</sub> and the solvent removed under reduced pressure to give the crude aminoalkene. The latter could be purified by bulb-to-bulb distillation or by flash column chromatography using silica gel and a gradient eluent system of 100:0 → 70:30 petroleum spirit (40-60 °C) : EtOAc. The pure substrates were distilled from CaH<sub>2</sub> or KOH, and stored under nitrogen.

## **Catalytic Intramolecular Hydroamination of Aminoalkenes**

**NMR scale experiments:** In a glove box, a solution of the aminoalkene (40 µL) and a known amount of TMSS (2-5 mg, internal standard) in C<sub>6</sub>D<sub>6</sub> (500 mg) was transferred to a Youngs tap NMR tube. A <sup>1</sup>H NMR spectrum was run to calculate the concentration of the substrate. The NMR tube was pumped back into the glovebox and the catalyst (2-20 mol %) added, the reaction was then monitored by NMR spectroscopy.

Figure S1:  $^1\text{H}$  NMR spectrum of **4** in  $\text{d}_8$ -toluene

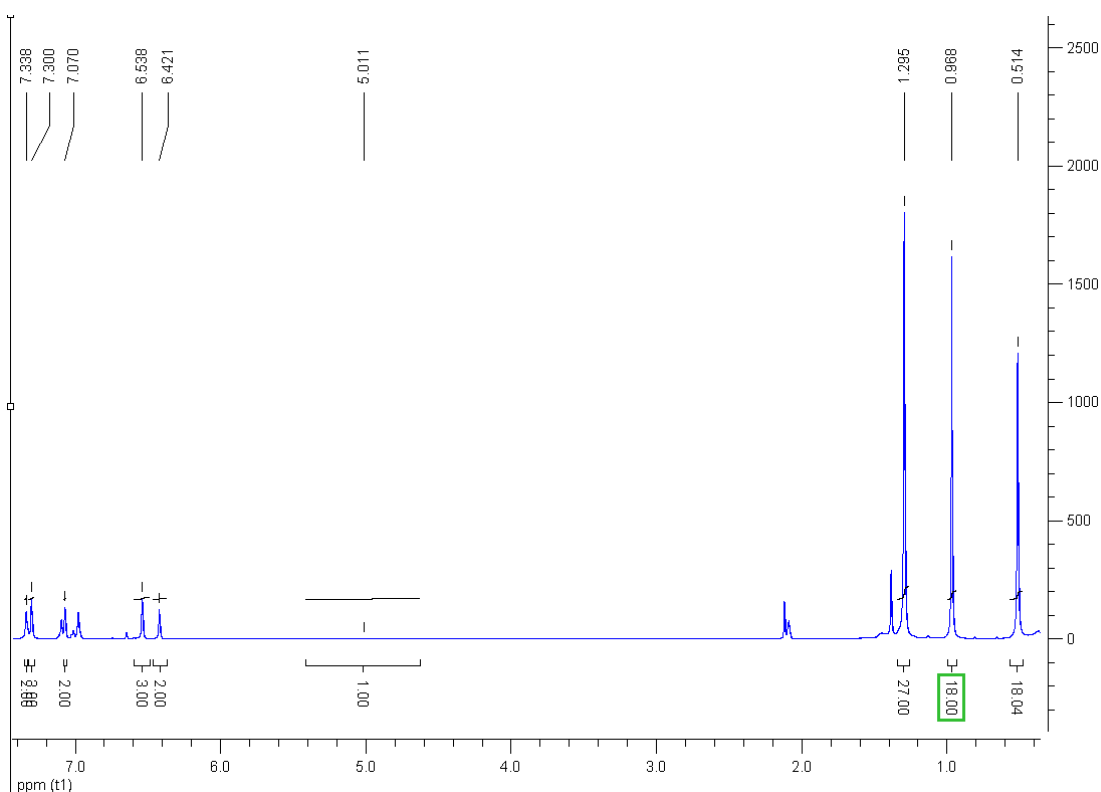

Figure S2: Enhanced view of the  $BH$  signal region for compound **4** in  $\text{d}_8$ -toluene

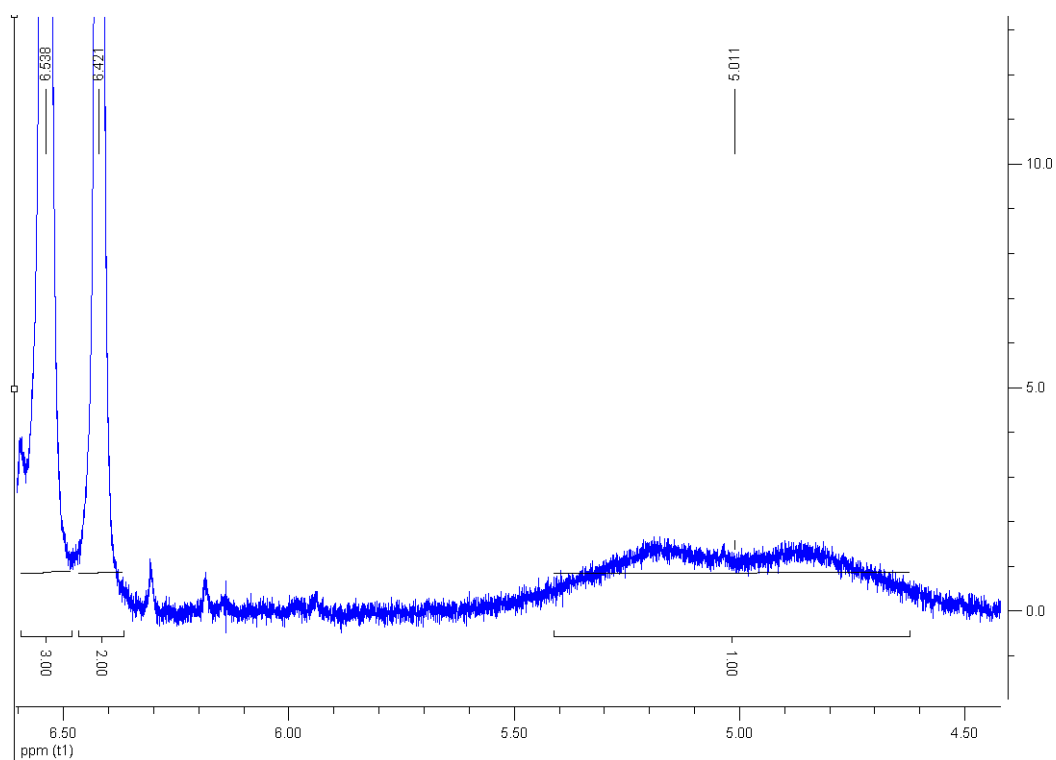

**Figure S3:**  $^1\text{H}$  NMR spectrum of a mixture of **2** and **8** in  $\text{d}_8$ -toluene

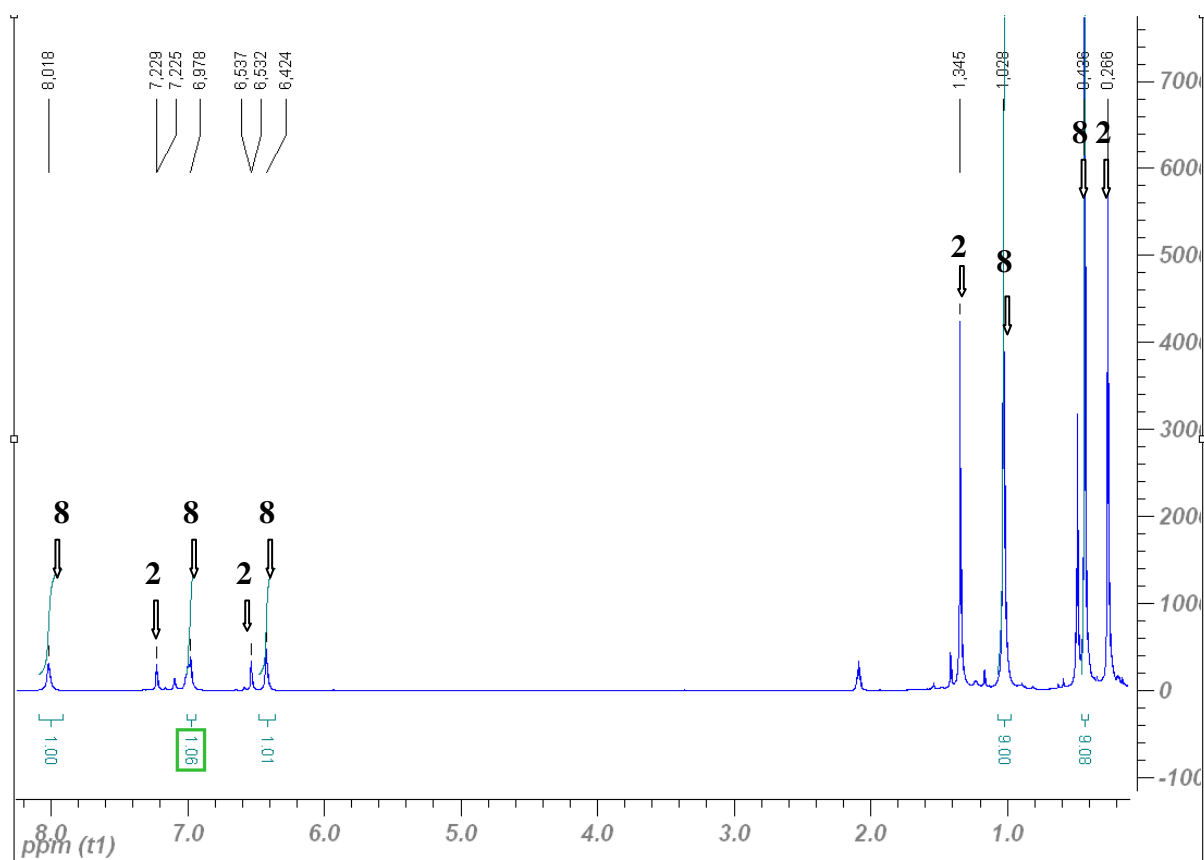

## References

- (1) Gagne, M. R.; Stern, C. L.; Marks, T. J., *J. Am. Chem. Soc.* **1992**, *114*, 275.
